# Supplementary material
Source: publisher figshare collection journal article supplement (https://tandf.figshare.com/ndownloader/files/21473487)
Supplement: Supplementary file 1 [file 21473487]

## Rehabilitation of companion animals following orthopaedic surgery

WI Baltzer<sup>\*§</sup>

<sup>\*</sup>School of Veterinary Science, Massey University, Palmerston North, 4442, New Zealand  
<sup>§</sup>Author for correspondence. Email: w.baltzer@massey.ac.nz

**Supplementary Table 1. Summary of published studies evaluating different therapies used for rehabilitation during the immediate (first 72 hours), subacute (3 days to weeks), and chronic (weeks to months) phases following orthopaedic surgery.**

| Therapy                                                         | Phase of recovery                | Goals of therapy                                                                                                                                                                                                                              | Method                                                                                                                                      | Outcomes                                             | References                                                                                                      |
|-----------------------------------------------------------------|----------------------------------|-----------------------------------------------------------------------------------------------------------------------------------------------------------------------------------------------------------------------------------------------|---------------------------------------------------------------------------------------------------------------------------------------------|------------------------------------------------------|-----------------------------------------------------------------------------------------------------------------|
| <b>Joint surgery</b>                                            |                                  |                                                                                                                                                                                                                                               |                                                                                                                                             |                                                      |                                                                                                                 |
| Cryotherapy                                                     | Immediate                        | Reduce inflammation and pain. Improve mobility and limb use                                                                                                                                                                                   | CCL repair surgery, ice pack around the limb from the stifle to the hock and secure with an elastic bandage, 20 minutes, every 4-6 hours    | Improved weight bearing and ROM                      | Rexing <i>et al.</i> 2010<br>Kieves <i>et al.</i> 2016<br>Ho <i>et al.</i> 1994 Martin <i>et al.</i> 2001       |
| Cold compression system cryotherapy                             | Immediate                        | Reduce inflammation and pain. Improve mobility, and limb use                                                                                                                                                                                  | CCL repair surgery, immediately pre- and post-operative or every 4-6 hours for up to 72 hours                                               | Improved weight bearing, ROM and reduced pain scores | Ho <i>et al.</i> 1994 Kirkby Shaw <i>et al.</i> 2019<br>Freedon <i>et al.</i> 2017<br>Critti <i>et al.</i> 2016 |
| Early limited mobility                                          | Immediate<br>Subacute            | Restore weight-bearing, balance and proprioception Develop normal gait patterning                                                                                                                                                             | Experimental CCL transection, crate rest without external coaptation for 6 weeks                                                            | Increased weight bearing and functional recovery     | Piper and Whiteside 1980                                                                                        |
| Early limited mobility with electrical stimulation and swimming | Immediate<br>Subacute<br>Chronic | Reverse arthrogenic muscle inhibition. Restore weight bearing, balance, proprioception, flexibility, ROM and muscle strength. Return normal neuromuscular patterning. Reverse compensatory patterns in other limbs. Restore level of activity | Extracapsular suture repair CCL: Walking 15-30 minutes, 3-4x daily for 6 weeks versus 2-4x weekly swimming and daily electrical stimulation | No difference in outcome                             | Jerre 2009                                                                                                      |

The content of this supplementary information has not been edited. All risk and liability rest with the authors.

## Supplementary Information

Baltzer

New Zealand Veterinary Journal

S2

|                                                            |                                  |                                                                                                                |                                                                                                                                                                  |                                                                                       |                                                            |
|------------------------------------------------------------|----------------------------------|----------------------------------------------------------------------------------------------------------------|------------------------------------------------------------------------------------------------------------------------------------------------------------------|---------------------------------------------------------------------------------------|------------------------------------------------------------|
|                                                            |                                  |                                                                                                                | Extracapsular suture repair CCL:<br>Passive ROM, electrical stimulation, swimming for 2 weeks vs. walking                                                        | Increased thigh mass and ROM                                                          | Millis <i>et al.</i> 1997                                  |
| Early limited mobility, passive ROM exercises and swimming | Immediate<br>Subacute<br>Chronic | As above                                                                                                       | Extracapsular suture repair CCL:<br>Every other week twice daily<br>Passive ROM, massage, swimming 10 minutes weeks 3, 5, 7 versus walking 0.3 miles daily       | Improved weight bearing.                                                              | Marsolais <i>et al.</i> 2002                               |
|                                                            |                                  |                                                                                                                | TPLO repair for CCL rupture:<br>Cryotherapy, massage, Passive ROM, therapeutic exercise daily and 3x weekly UWT for 6 weeks versus walking 5-30 minutes 2x daily | Increased thigh mass and range of motion                                              | Monk <i>et al.</i> 2006                                    |
| Aquatic therapy                                            | Subacute<br>Chronic              | As above                                                                                                       | Extracapsular suture repair CCL:<br>Cryotherapy, Passive ROM, electrical stimulation, aquatic therapy                                                            | Improved functional recovery (eight dogs)                                             | Berte <i>et al.</i> 2012                                   |
|                                                            |                                  |                                                                                                                | TPLO repair for CCL: rupture<br>Therapeutic exercise (sit to stands), UWT 1-3x weekly for 8 weeks versus leash walks                                             | Improved weight bearing, increased activity, reduced osteoarthritis progression       | Baltzer <i>et al.</i> 2018<br>Verpaalen <i>et al.</i> 2018 |
| Neuromuscular electrical stimulation                       | Immediate<br>Subacute            | Reduce inflammation and pain. Improve mobility and ROM. Promote controlled limb use. Recruit muscle activation | Once daily to 3 times per week for 8 weeks                                                                                                                       | Improved lameness, reduced radiographic osteoarthritis, but increased meniscal damage | Johnson <i>et al.</i> 1997                                 |
| Photobiomodulation (laser therapy)                         | Immediate<br>Subacute            | Reduce inflammation and pain. Facilitate healing Improve mobility and ROM                                      | Single treatment immediately preoperative TPLO for CCL rupture, 800- 970 nm dual energy, 3.5 j/cm <sup>2</sup>                                                   | Improved weight-bearing at 8 weeks postoperatively                                    | Rogatko <i>et al.</i> 2017                                 |
|                                                            |                                  |                                                                                                                | Daily postoperative TPLO for CCL rupture: 635 nm wavelength, 2.25 j/cm <sup>2</sup>                                                                              | No significant effect vs. controls                                                    | Kennedy <i>et al.</i> 2018                                 |
| <b>Tendon, ligament repair</b>                             |                                  |                                                                                                                |                                                                                                                                                                  |                                                                                       |                                                            |
| Passive ROM exercises                                      | Immediate<br>Subacute<br>Chronic | Recruit muscle activation. Restore weight-bearing, proprioception, and normal gait patterning                  | Flexor tendon repair surgery, Passive ROM 12 cycles per minute for 5 minutes once a day                                                                          | Increased joint ROM and weight bearing                                                | Takai <i>et al.</i> 1991                                   |

**Bone fracture healing**

|                                     |                            |                                                                                              |                                                                                                                                             |                                                 |                                                        |
|-------------------------------------|----------------------------|----------------------------------------------------------------------------------------------|---------------------------------------------------------------------------------------------------------------------------------------------|-------------------------------------------------|--------------------------------------------------------|
| Extracorporeal shockwave therapy    | Immediate Subacute         | Reduce inflammation and pain. Facilitate healing                                             | Experimentally induced tibial fracture 2000 pulses at 14 kV                                                                                 | Increased bone union at 12 weeks                | Wang <i>et al.</i> 2001                                |
|                                     |                            |                                                                                              | CCL repair following TPLO or TTA 1,000 pulses, 0.15 mJ/cm <sup>2</sup> repeated once at 2 or 4 weeks                                        | Increased bone density compared to sham-treated | Barnes <i>et al.</i> 2015<br>Kieves <i>et al.</i> 2015 |
| Therapeutic ultrasound              | Immediate Subacute Chronic | Reduce inflammation and pain. Facilitate healing.                                            | Following osteochondral autograft for joint defects 6 days/week for 6 weeks (30 mW/cm <sup>2</sup> , 1.5 MHz, burst width 200 microseconds) | Enhanced transplant survival                    | Cook <i>et al.</i> 2008                                |
|                                     |                            |                                                                                              | 20 minutes daily for 4 weeks (1 MHz, 200 microsecond burst, 50 mW/cm <sup>2</sup> induced bone defect in dogs                               | Increased bone production vs. control           | Yang 2001                                              |
|                                     |                            |                                                                                              | Post-TPLO for CCL repair: 20 minutes daily for 12 weeks (1.5 MHz, 30 mW/cm <sup>2</sup> , 20% duty cycle)                                   | No difference in outcome or bone production     | Kieves <i>et al.</i> 2018                              |
| <b>Hemilaminectomy <sup>a</sup></b> |                            |                                                                                              |                                                                                                                                             |                                                 |                                                        |
| Photobiomodulation (laser therapy)  | Immediate Subacute         | Reduce inflammation and pain. Improve mobility, ROM. Return normal neuromuscular patterning. | 810 nm wavelength, 5x200 mW, pulsed mode once daily for 5 days                                                                              | Ambulatory in 3 days vs. 14 days in controls    | Draper <i>et al.</i> 2012                              |
|                                     |                            |                                                                                              | 635-nm wavelength, 4x5 mW, pulsed mode once daily for 4 days                                                                                | No significant effect                           | Bennaim <i>et al.</i> 2017                             |

<sup>a</sup> For thoracolumbar intervertebral disc herniation

CCL=cranial cruciate ligament; ROM=range of motion, TPLO=tibial plateau levelling osteotomy, TTA=tibial tuberosity advancement; UWT=underwater treadmill therapy
